# Supplementary material for: Detection and Molecular Characterization of Novel dsRNA Viruses Related to the Totiviridae Family in Umbelopsis ramanniana
Source: PubMed Central journal article supplement (PMC6644447; doi:10.3389/fcimb.2019.00249), 2019-07-11
Supplement: Table_2.pdf [file Table_2.pdf]

**Supplementary Table 2** List of primers applying for amplification of cDNAs and hybridization probes.

| <b>Primer*</b> | <b>Sequence (5' - 3')</b>                                         | <b>Application</b>                                 | <b>Reference</b>       |
|----------------|-------------------------------------------------------------------|----------------------------------------------------|------------------------|
| PC3-T7 loop    | p- GGATCCCGGGAATTCGGTAATACGACTC<br>ACTATATTTTTATAGTGAGTCGTATTA-OH | self-priming anchor primer for<br>cDNA synthesis   | Potgieter et al., 2009 |
| PC2            | p-CCGAATTCCCGGGATCC                                               | Amplification of cDNA                              | Potgieter et al., 2009 |
| UrV1CP F       | CTTGACCAGGCTTATGATGACC                                            | Amplification of probe for<br>UrV1 CP              | In this study          |
| UrV1CP R       | AAATCGGCTAGAACGACATTCAG                                           |                                                    |                        |
| UrV1RdRp F     | GTTGCCGACTGAATTGTTTGAG                                            | Amplification of probe for<br>UrV1 RdRp            | In this study          |
| UrV1RdRp R     | CCACCTTGACATCCAGAAATCC                                            |                                                    |                        |
| UrV2RdRp F     | AGTGCTATACTATACGCTTCGGG                                           | Amplification of probe for<br>UrV2 RdRp            | In this study          |
| UrV2RdRp R     | TCGACTTTAAGCTCCTCATCCA                                            |                                                    |                        |
| UrV3RdRp F     | TTCAACGGGTAAATTCACCTCAGG                                          | Amplification of probe for<br>UrV3 RdRp            | In this study          |
| UrV3RdRp R     | CATCATACCCAAGTGTTTCATCGT                                          |                                                    |                        |
| UrV4CP F       | CAAAGACAGCATCAAGACTAACCT                                          | Amplification of probe for<br>UrV4 CP              | In this study          |
| UrV4CP R       | CCAGTAGACAATTCGCCTTGAG                                            |                                                    |                        |
| UrV4RdRp F     | TCAAATATTCTCACCGTGTAGCAG                                          | Amplification of probe for<br>UrV4 RdRp            | In this study          |
| UrV4RdRp R     | AATACGAATCCTGTTAGAATCGCC                                          |                                                    |                        |
| UrV2RdRp F     | AGTGCTATACTATACGCTTCGGG                                           | Specific amplification of<br>partial UrV2 fragment | In this study          |
| UrV2PCR R      | TATAGGTAGTGTAAGTACGCC                                             |                                                    |                        |

\*F and R indicating forward and reverse primers, respectively.
